# Supplementary material for: A Novel E3 Probiotics Formula Restored Gut Dysbiosis and Remodelled Gut Microbial Network and Microbiome Dysbiosis Index (MDI) in Southern Chinese Adult Psoriasis Patients
Source: MDPI journal article supplement (doi:10.3390/ijms24076571), 2023-03-31

Supplementary Figure S1

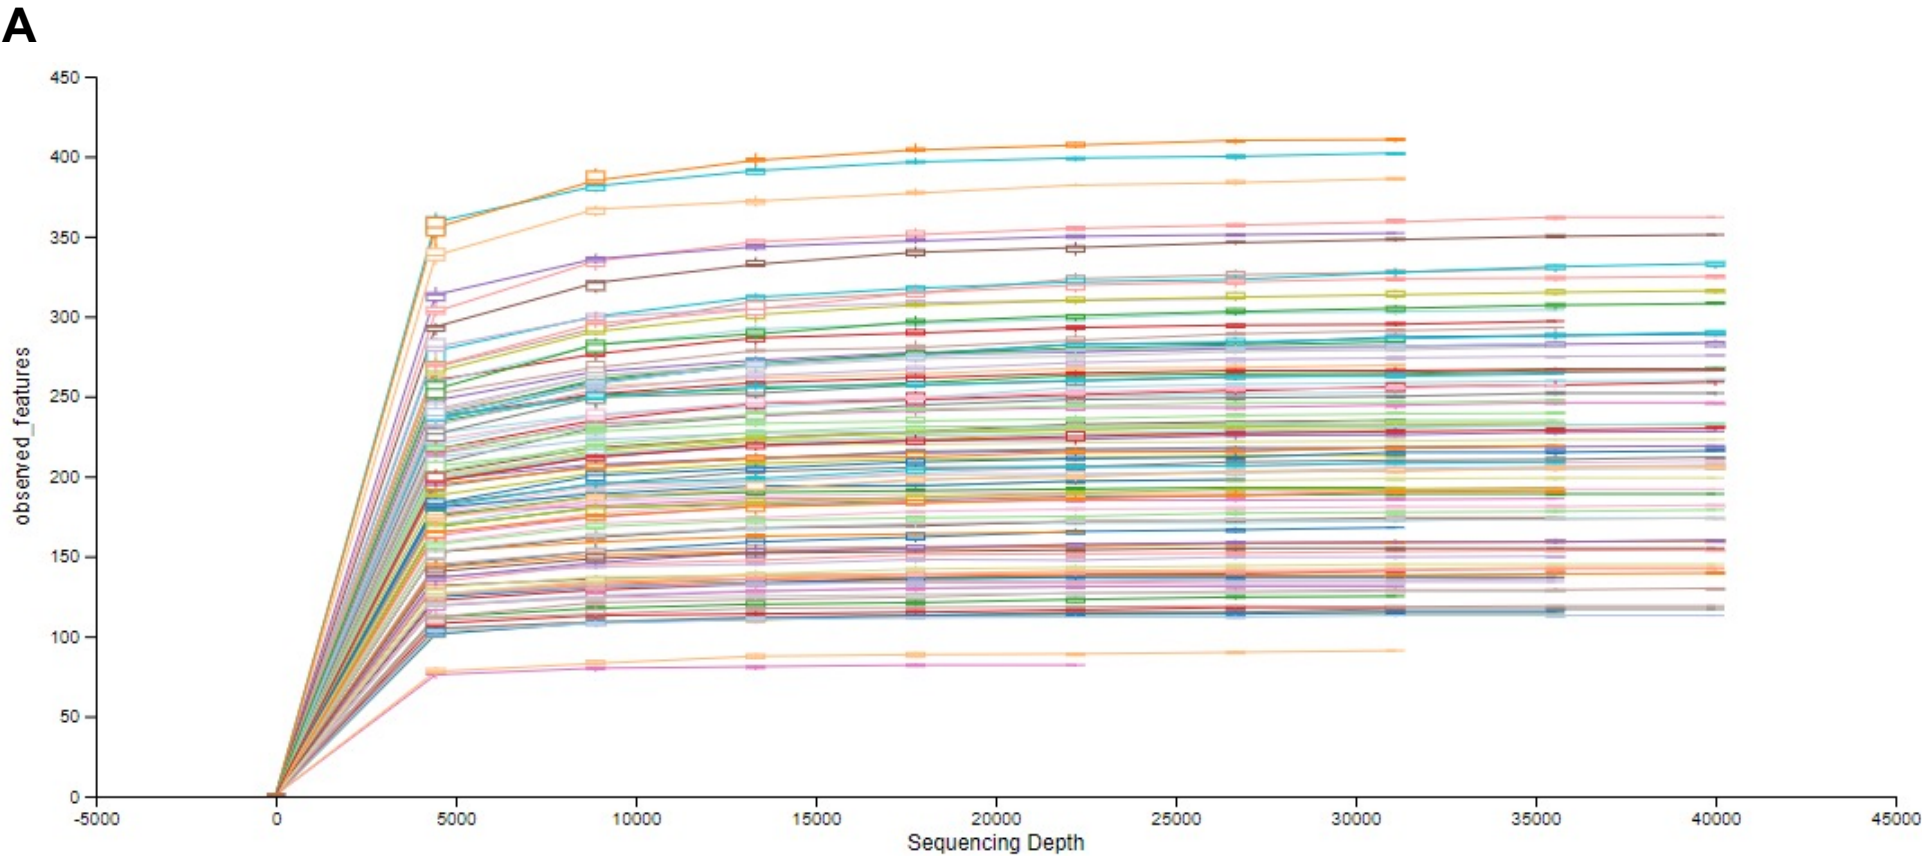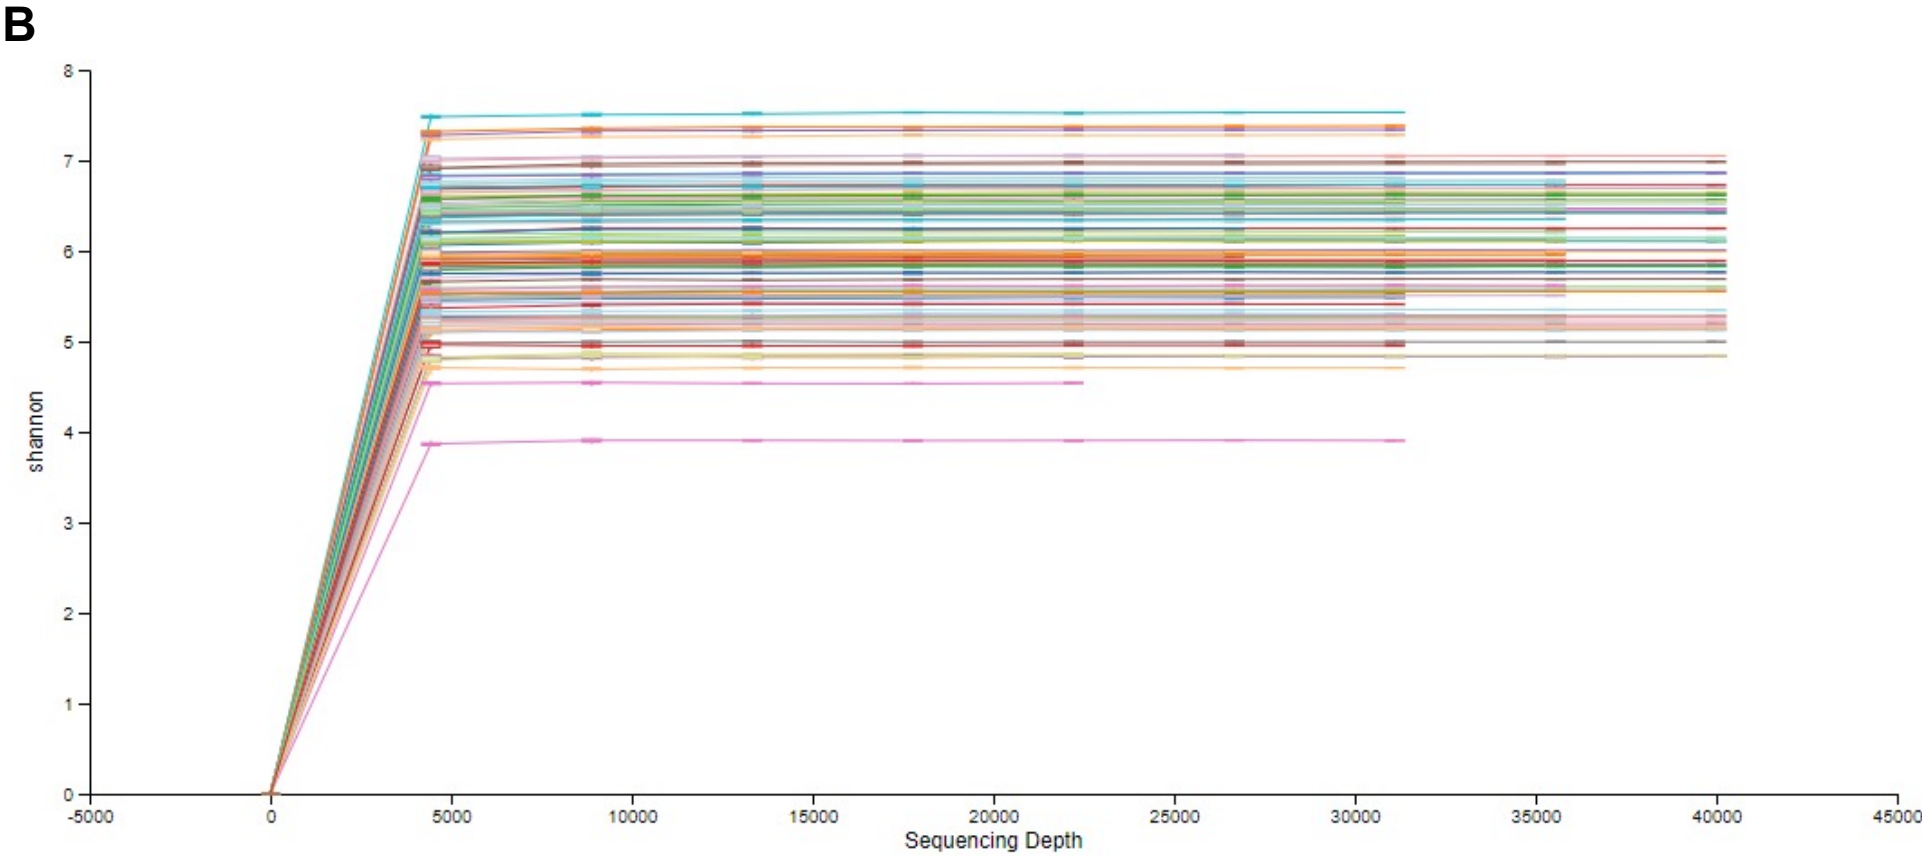

Supplementary Figure S2

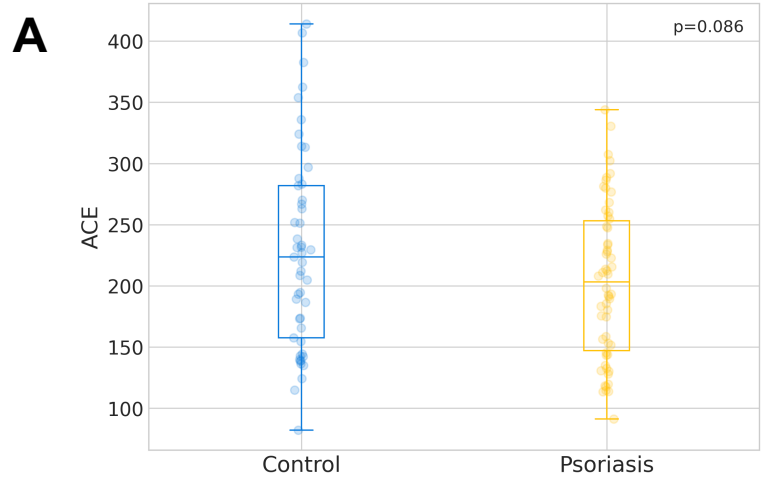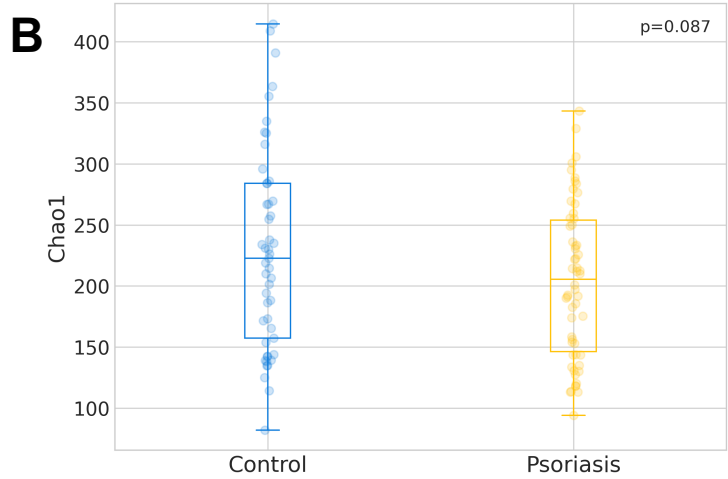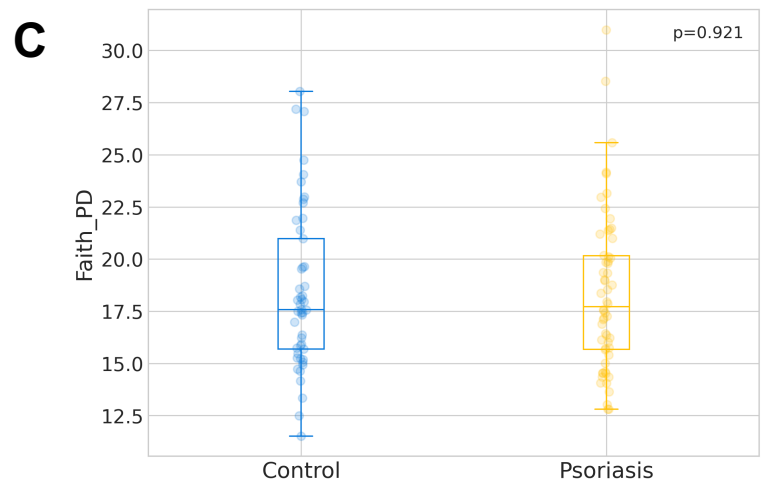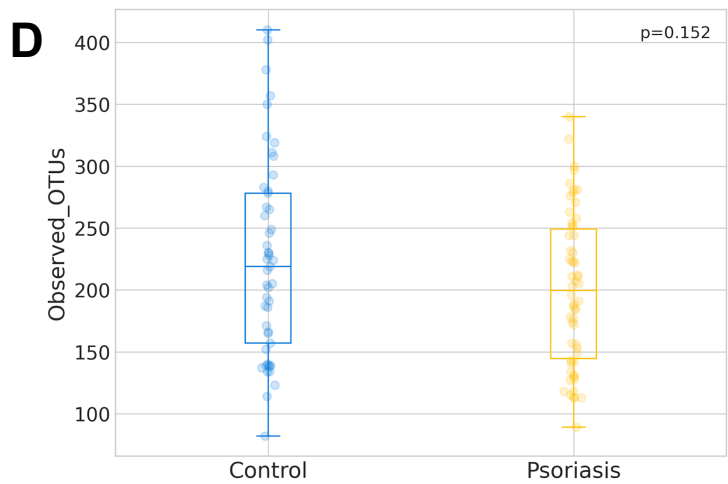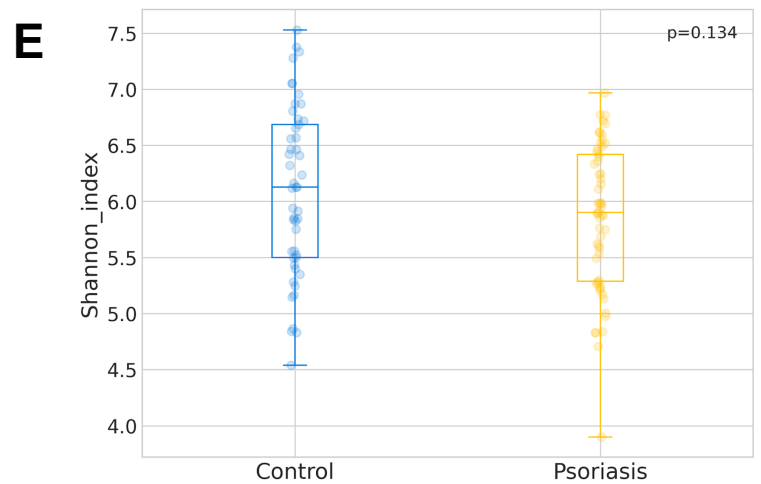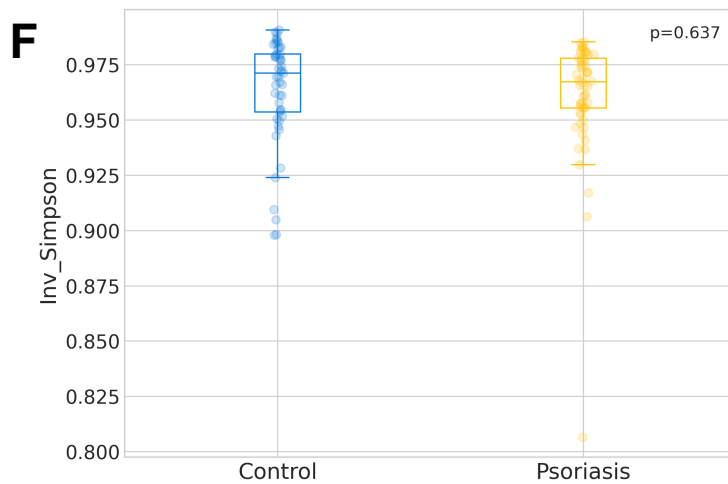

Supplementary Figure S3

**A**

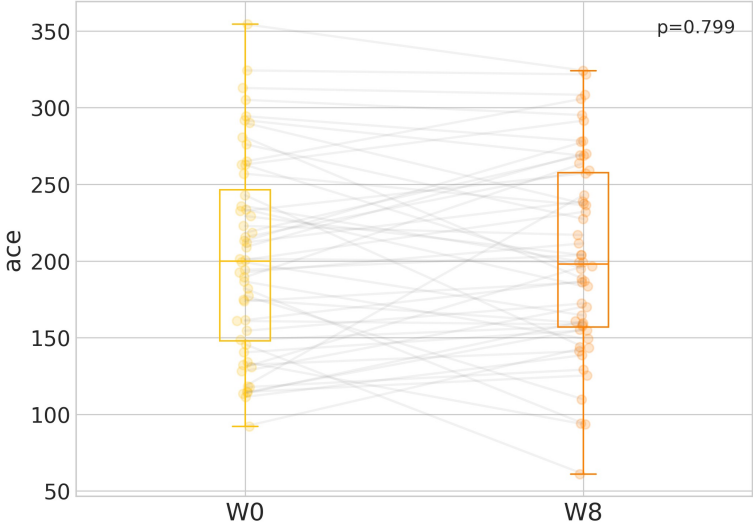

**B**

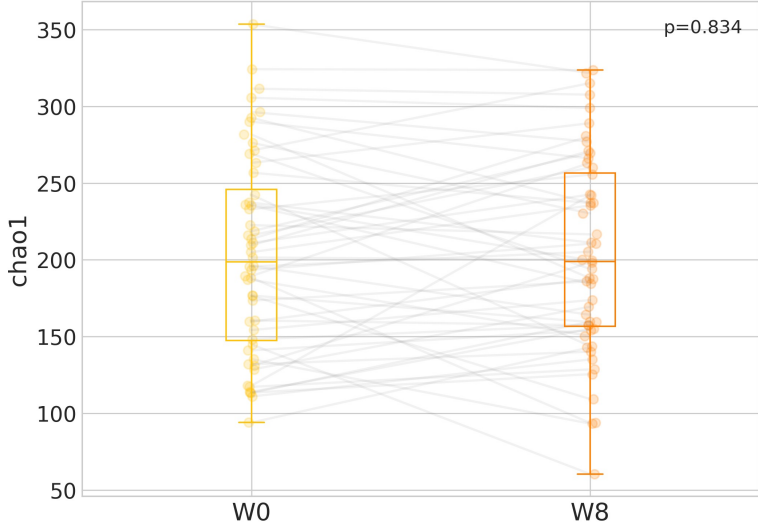

**C**

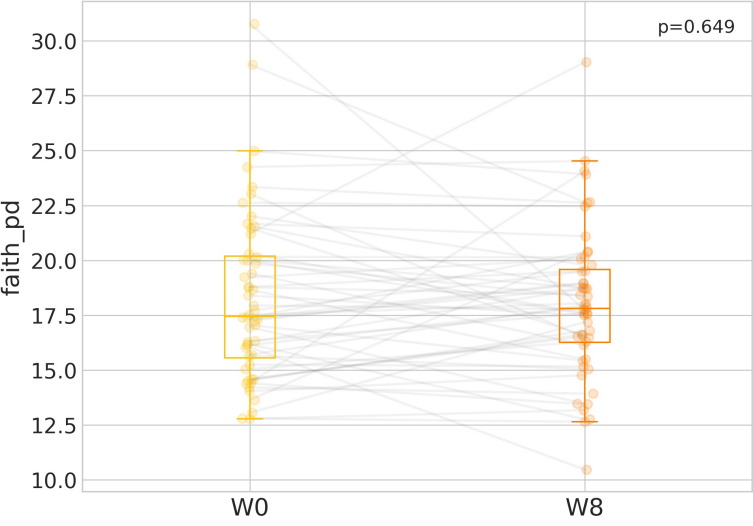

**D**

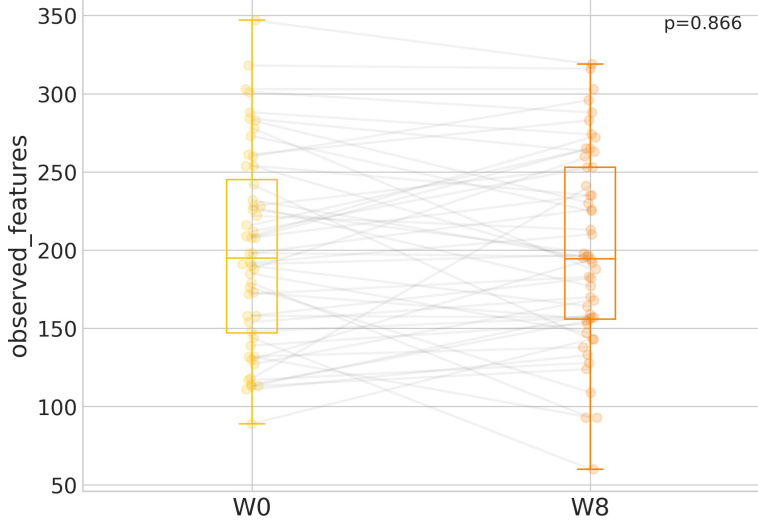

**E**

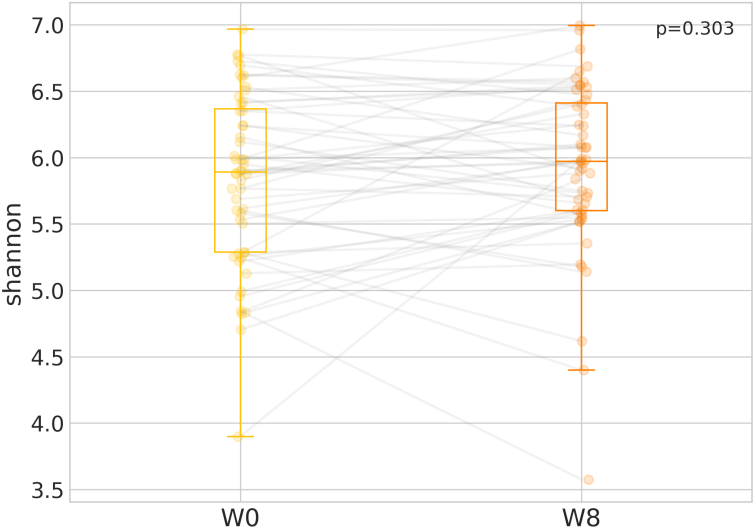

**F**

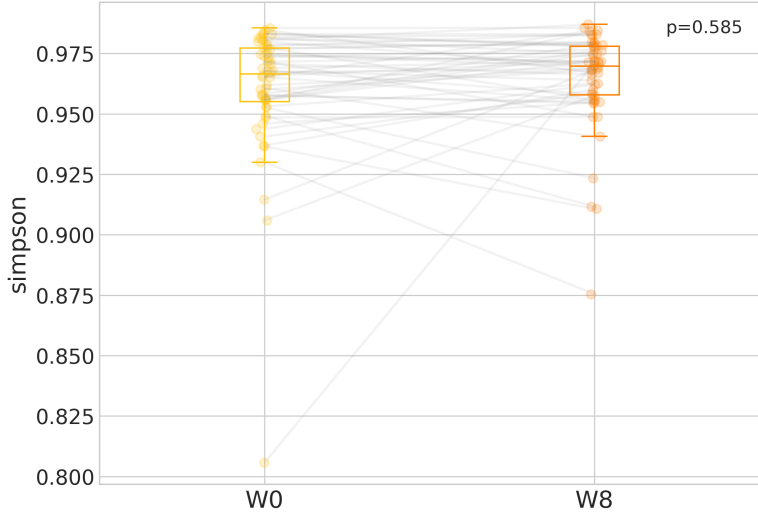

# Supplementary Figure S4

A

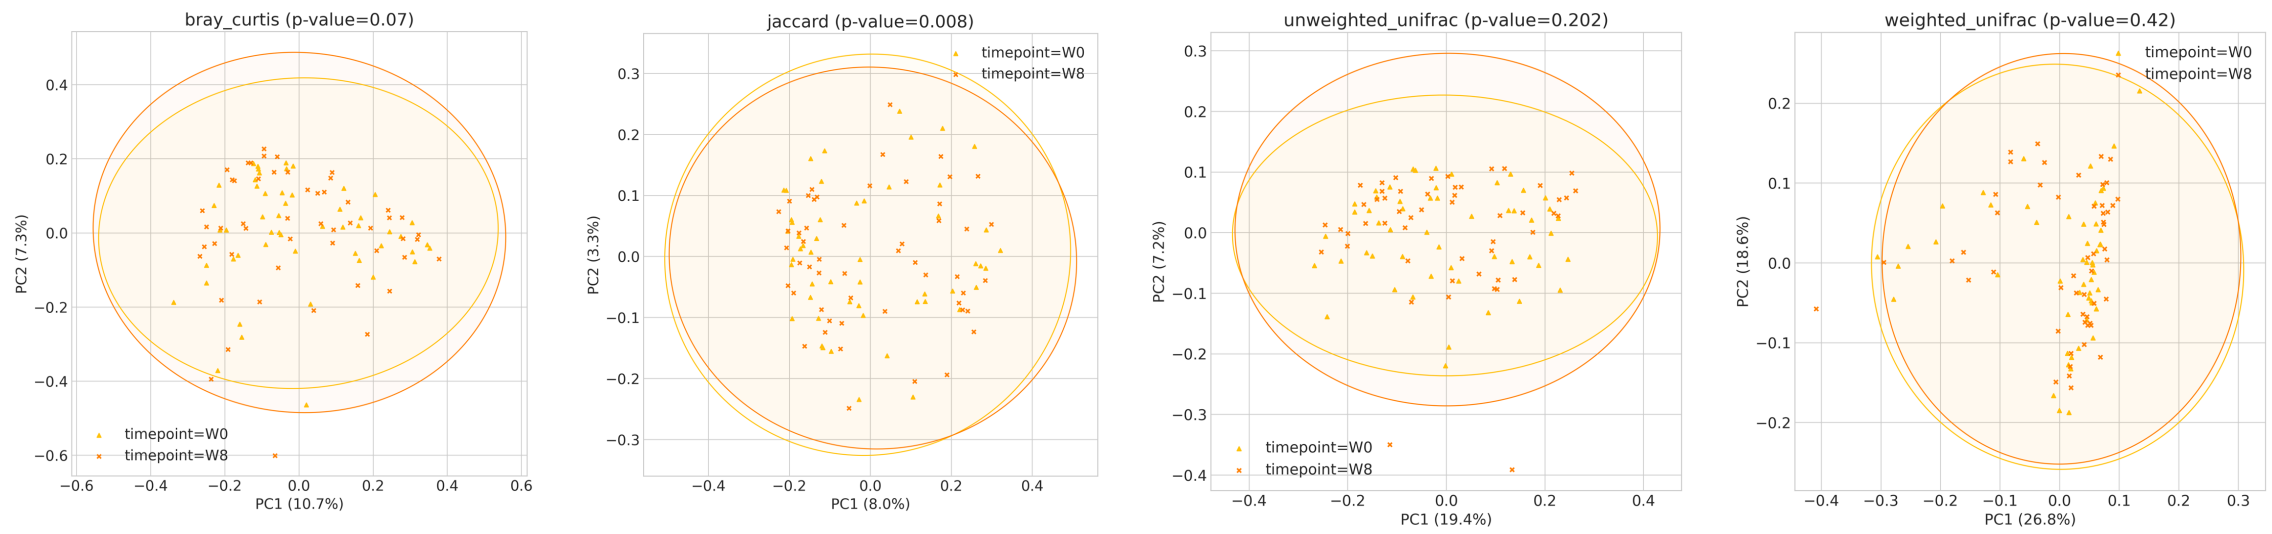

B

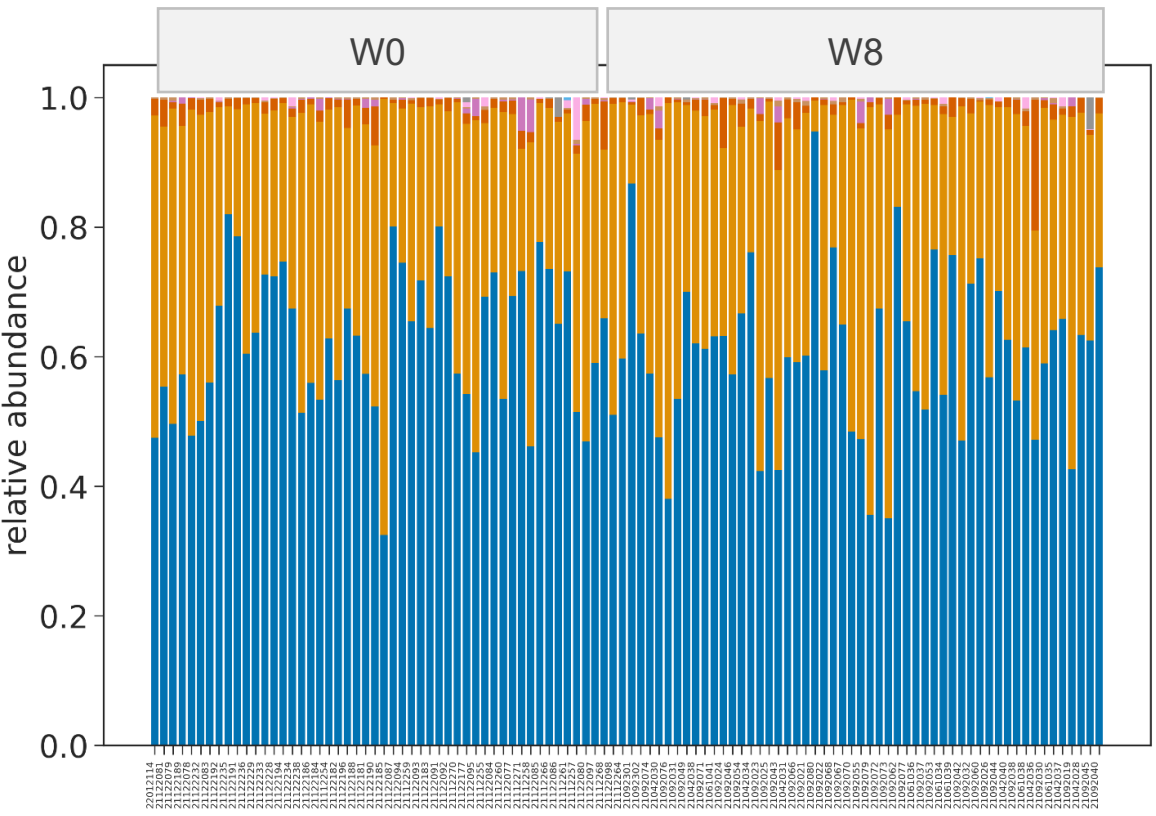

C

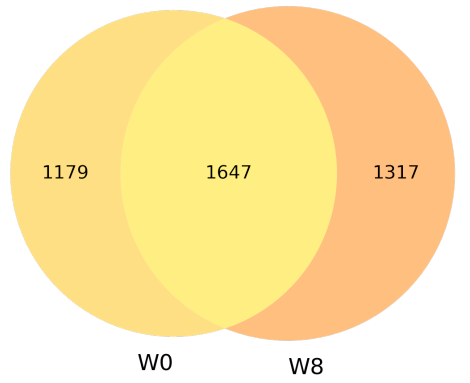

D

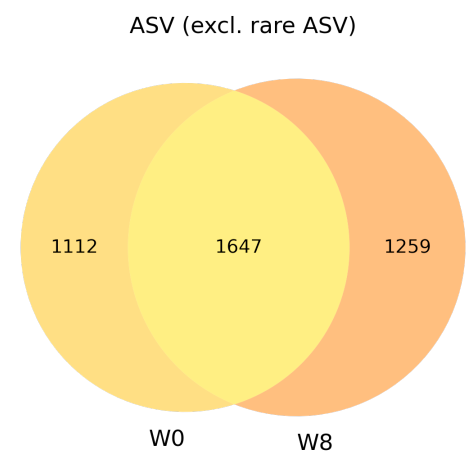

Supplementary Figure S5

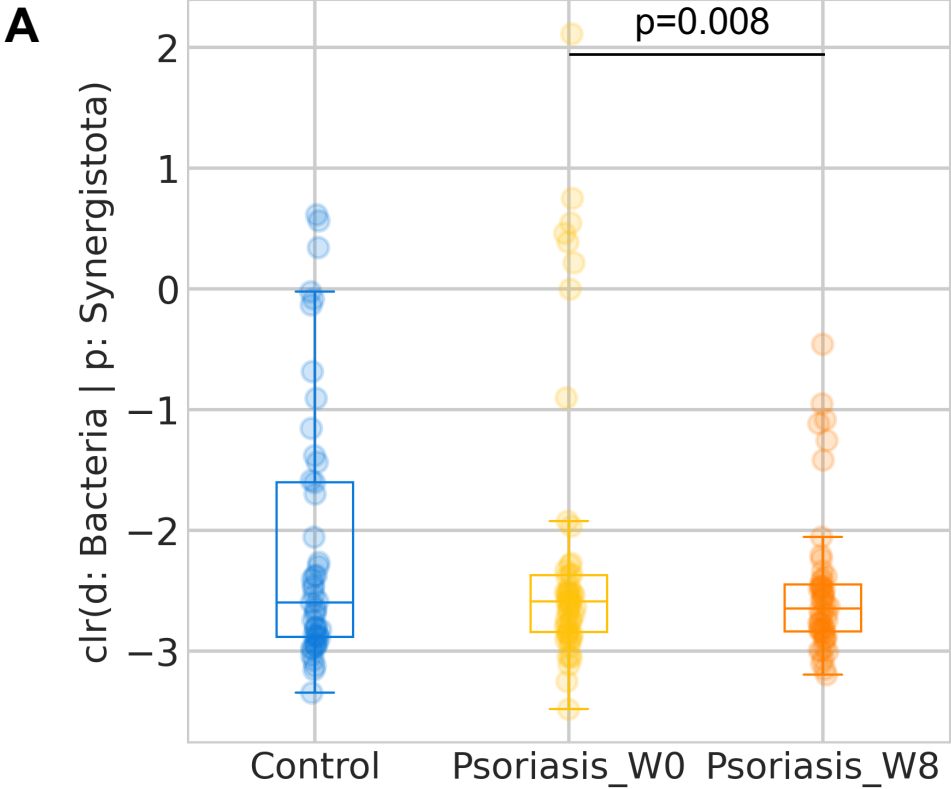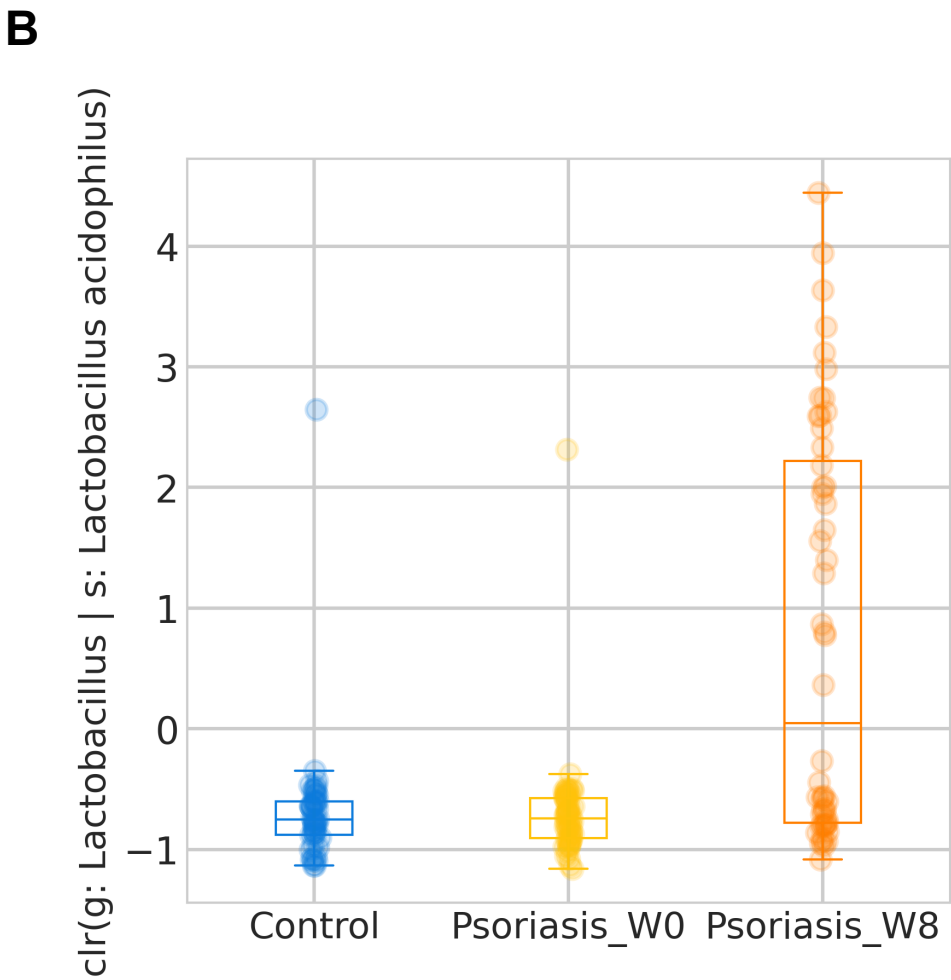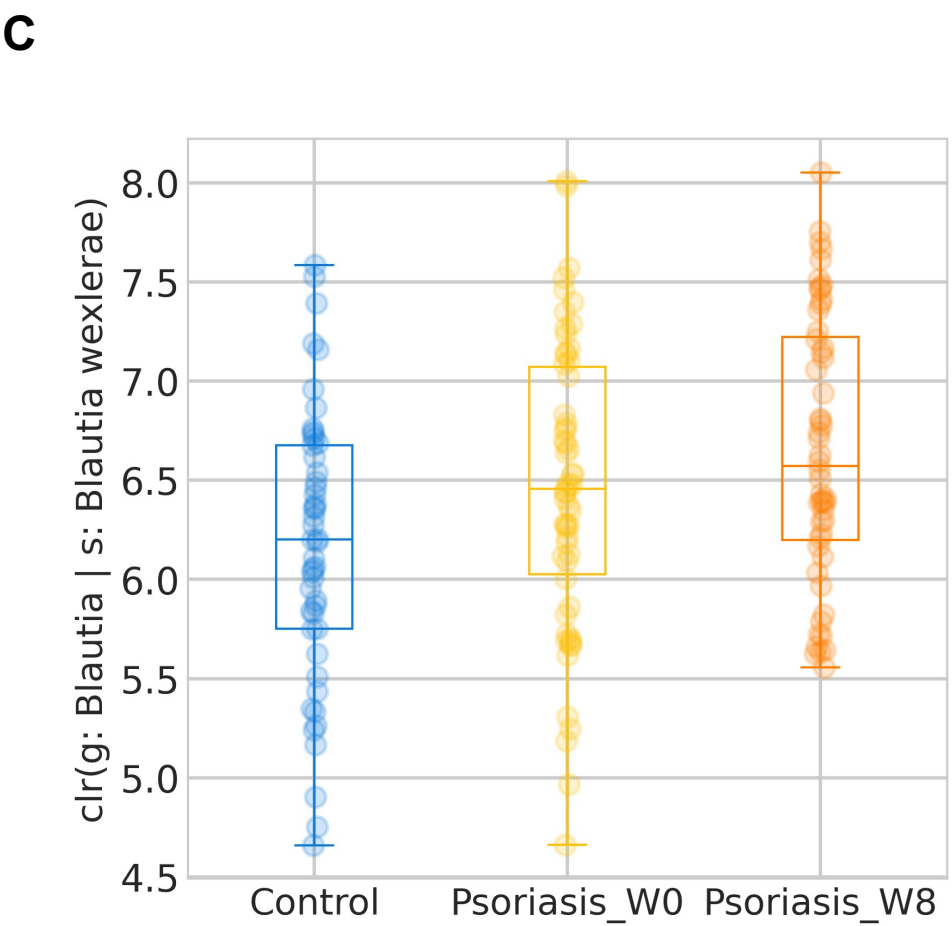

Supplementary Figure S6

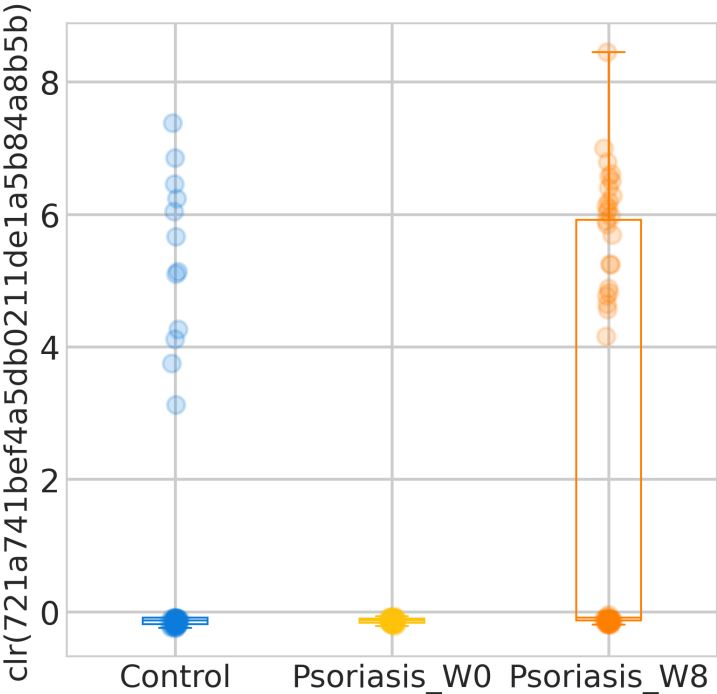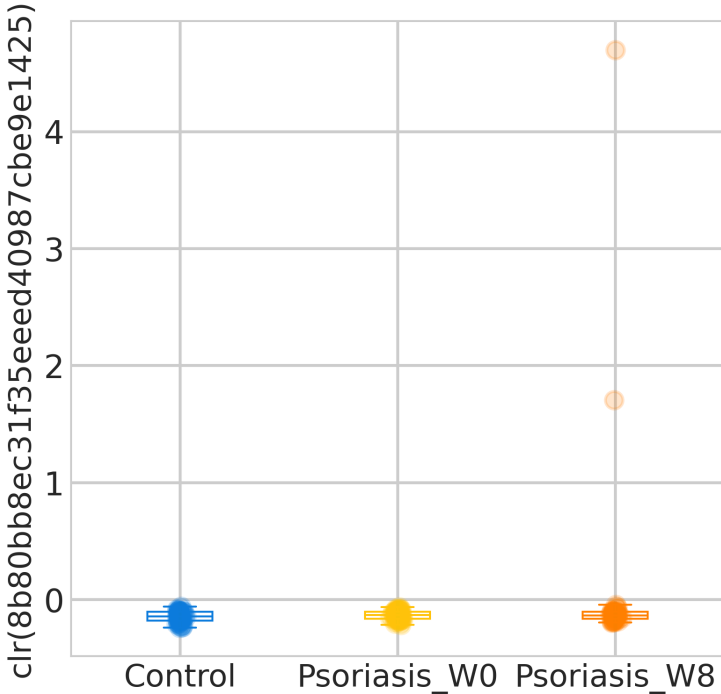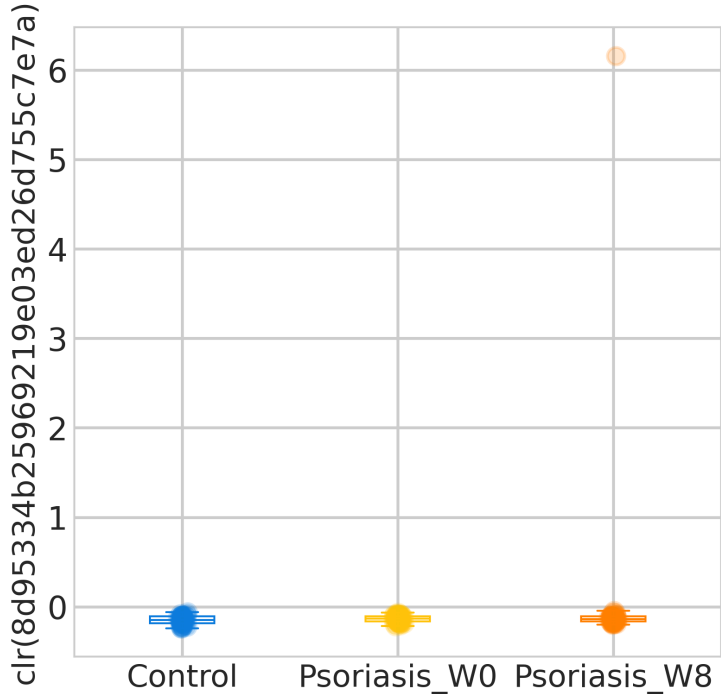

Supplementary Figure S7

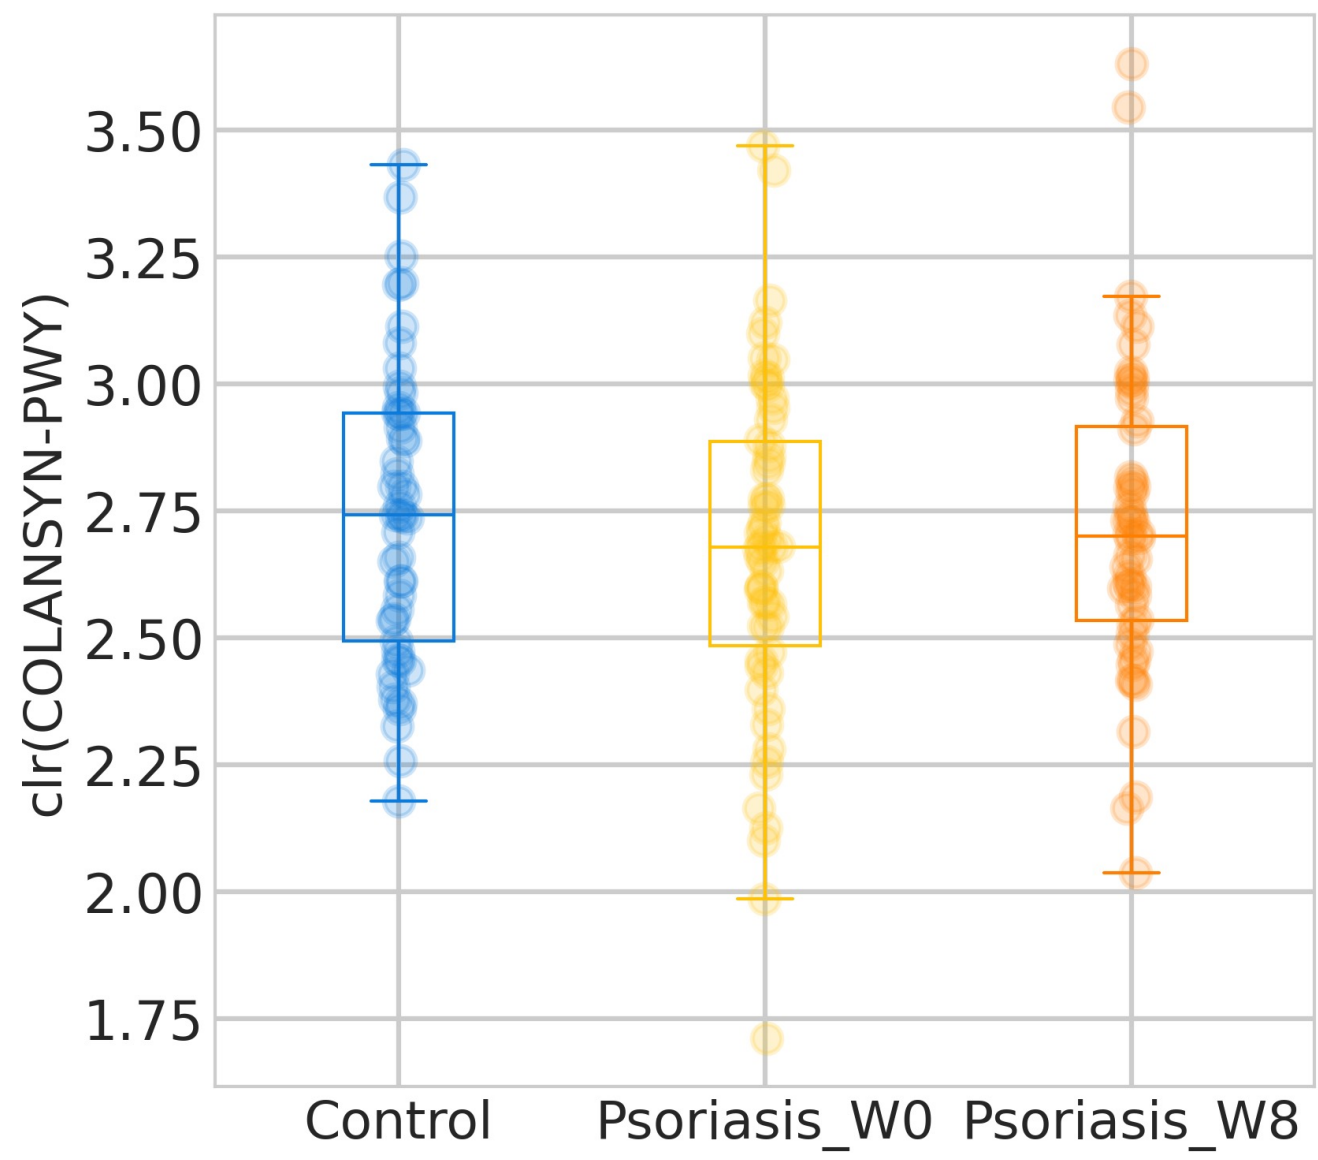

Supplementary Figure S8

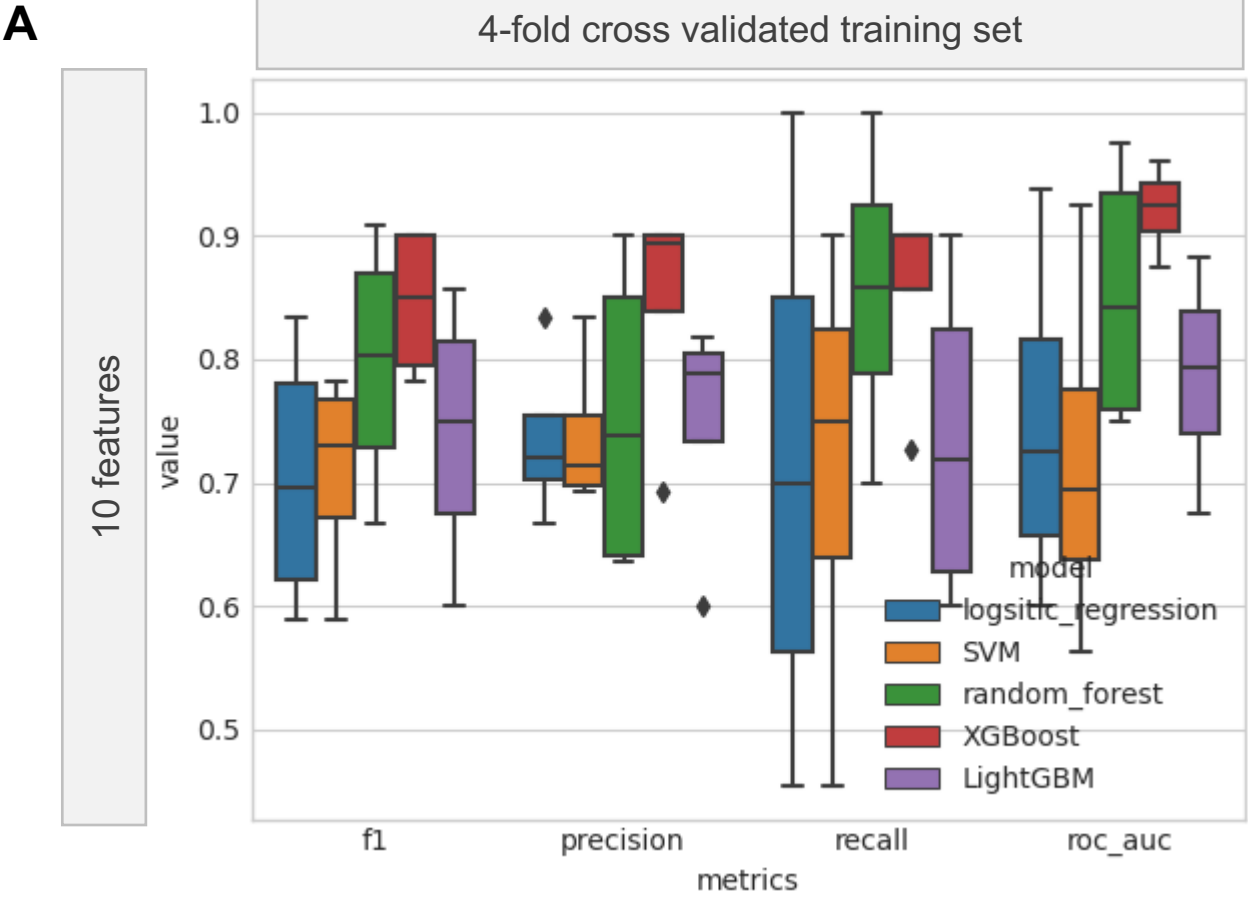

| 25% held out test set |             |             |             |             |
|-----------------------|-------------|-------------|-------------|-------------|
|                       | F           | Precision   | Recall      | AUROC       |
| LR                    | 0.78        | <u>1.00</u> | 0.64        | 0.82        |
| SVM                   | 0.83        | <u>1.00</u> | 0.71        | 0.86        |
| RF                    | <u>0.89</u> | 0.92        | <u>0.86</u> | <u>0.88</u> |
| XGB                   | 0.86        | 0.86        | <u>0.86</u> | 0.83        |
| LGBM                  | <u>0.89</u> | 0.92        | <u>0.86</u> | <u>0.88</u> |

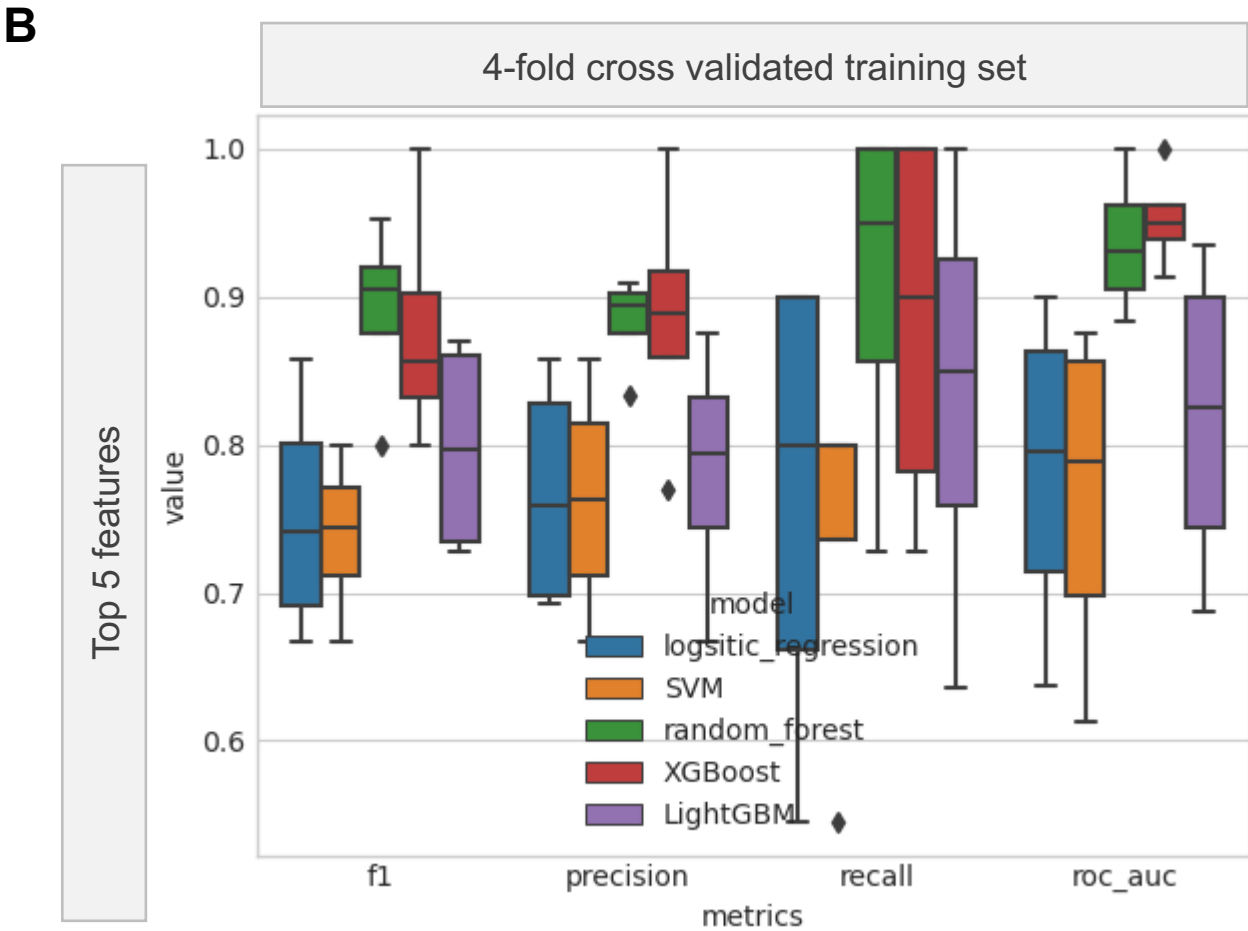

| 25% held out test set |             |             |             |             |
|-----------------------|-------------|-------------|-------------|-------------|
|                       | F           | Precision   | Recall      | AUROC       |
| LR                    | 0.78        | <u>1.00</u> | 0.64        | 0.82        |
| SVM                   | 0.78        | <u>1.00</u> | 0.64        | 0.82        |
| RF                    | 0.87        | 0.82        | <u>0.93</u> | 0.81        |
| XGB                   | 0.86        | 0.86        | 0.86        | 0.83        |
| LGBM                  | <u>0.89</u> | 0.92        | 0.86        | <u>0.88</u> |



Supplementary Figure S9

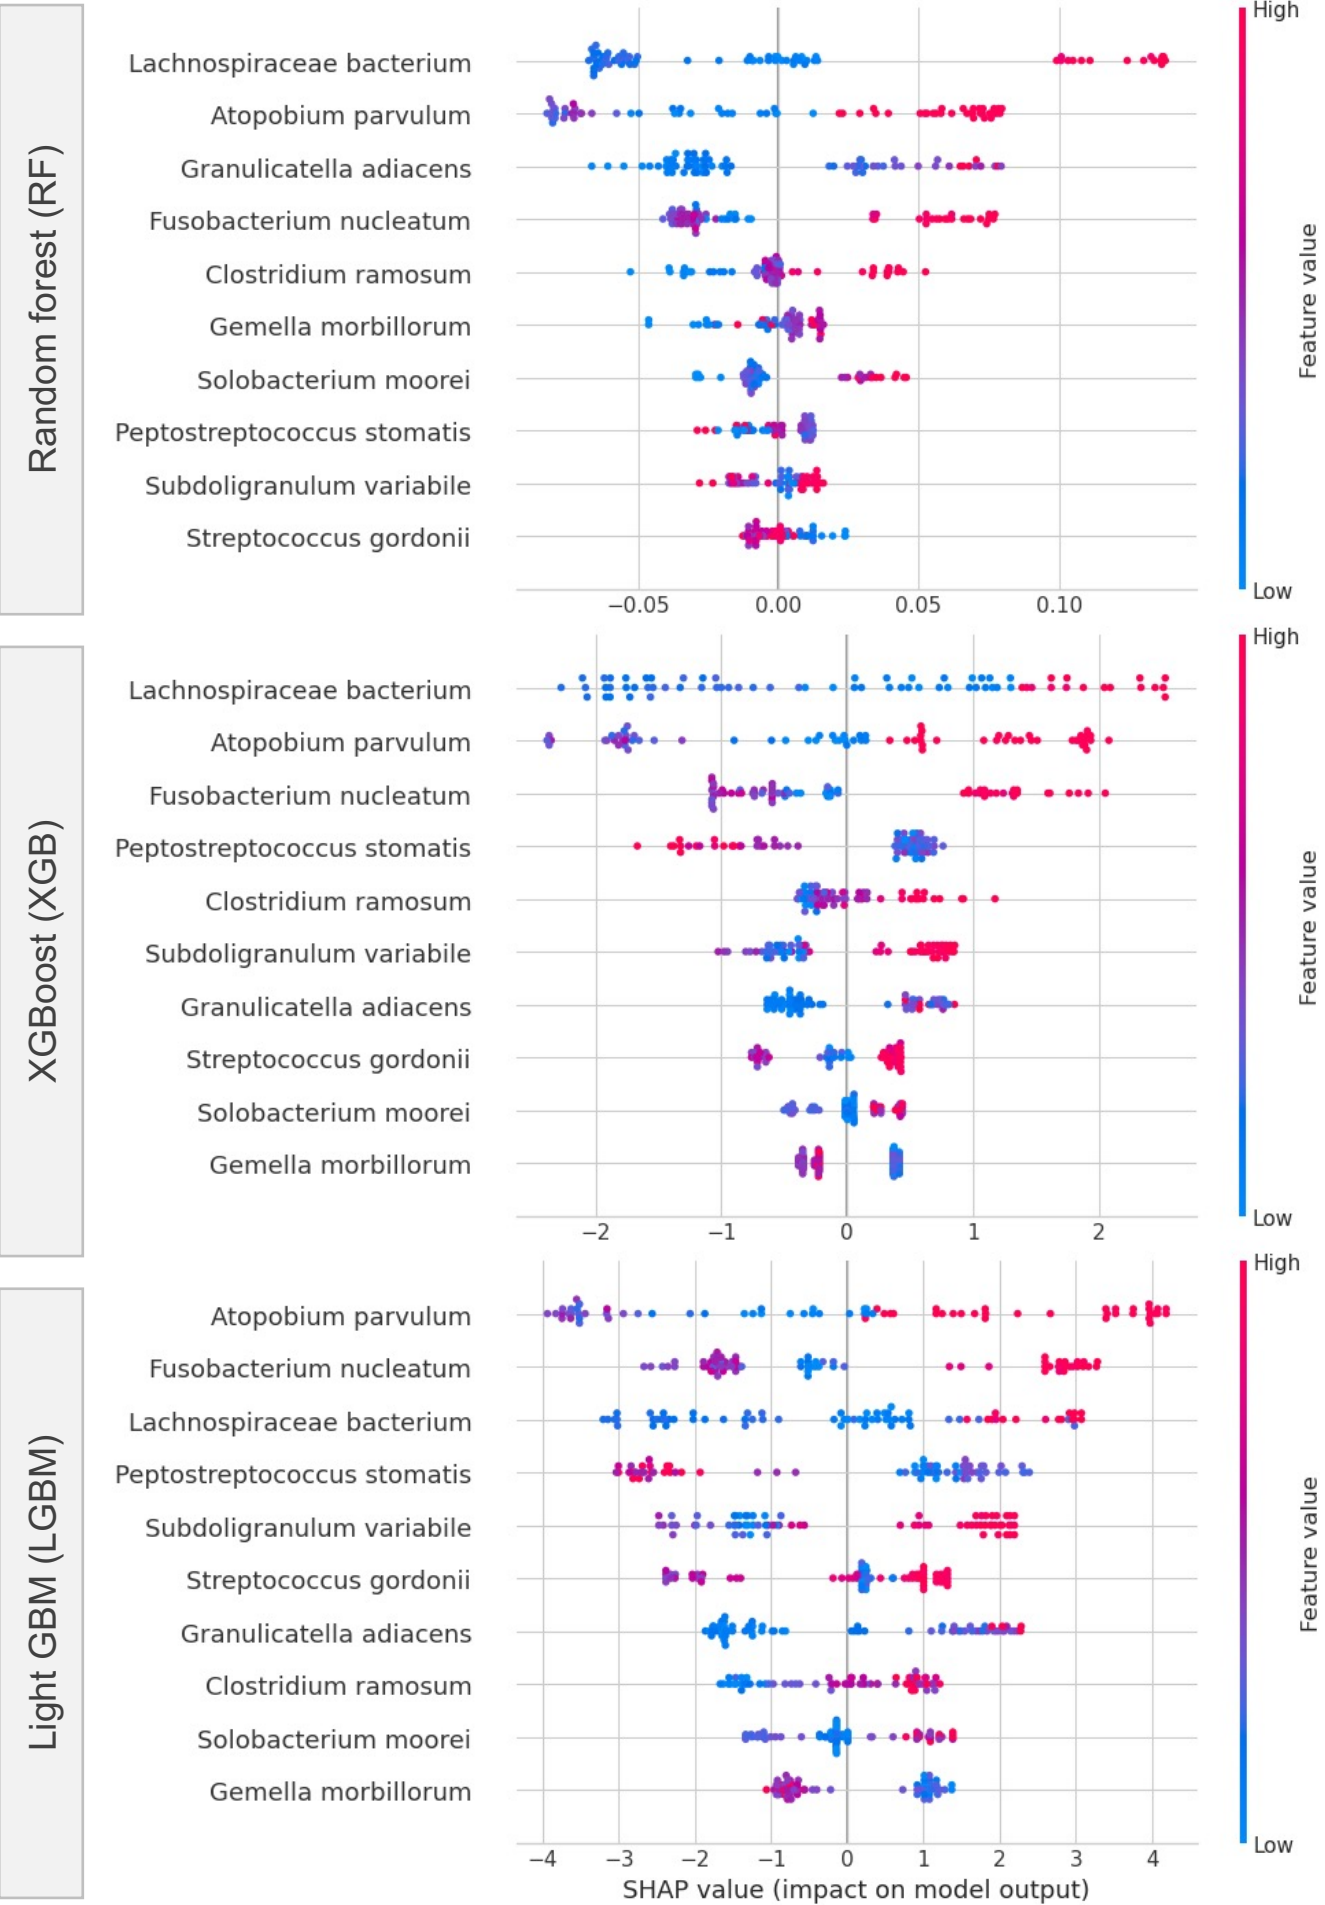

Supplementary Figure S10

A

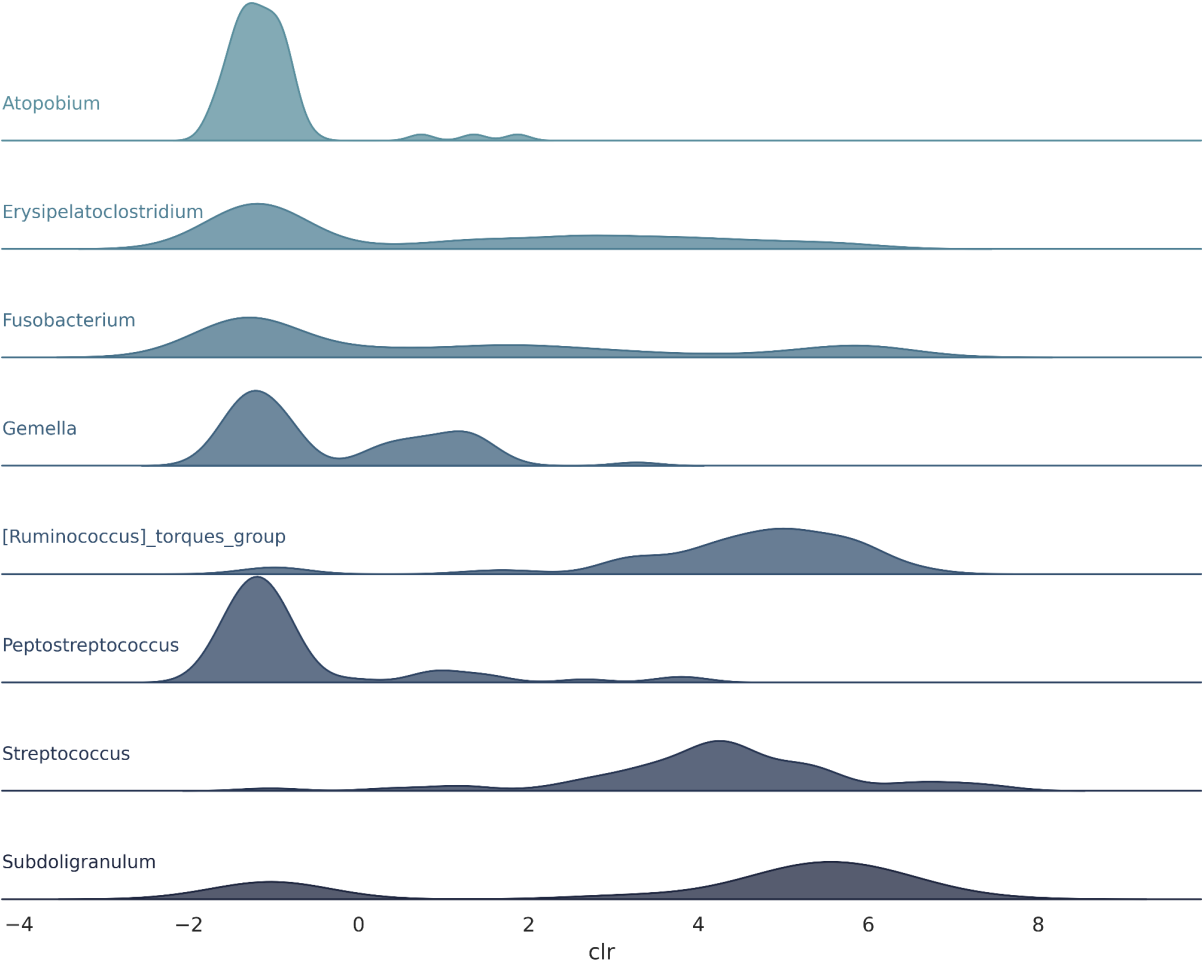

B

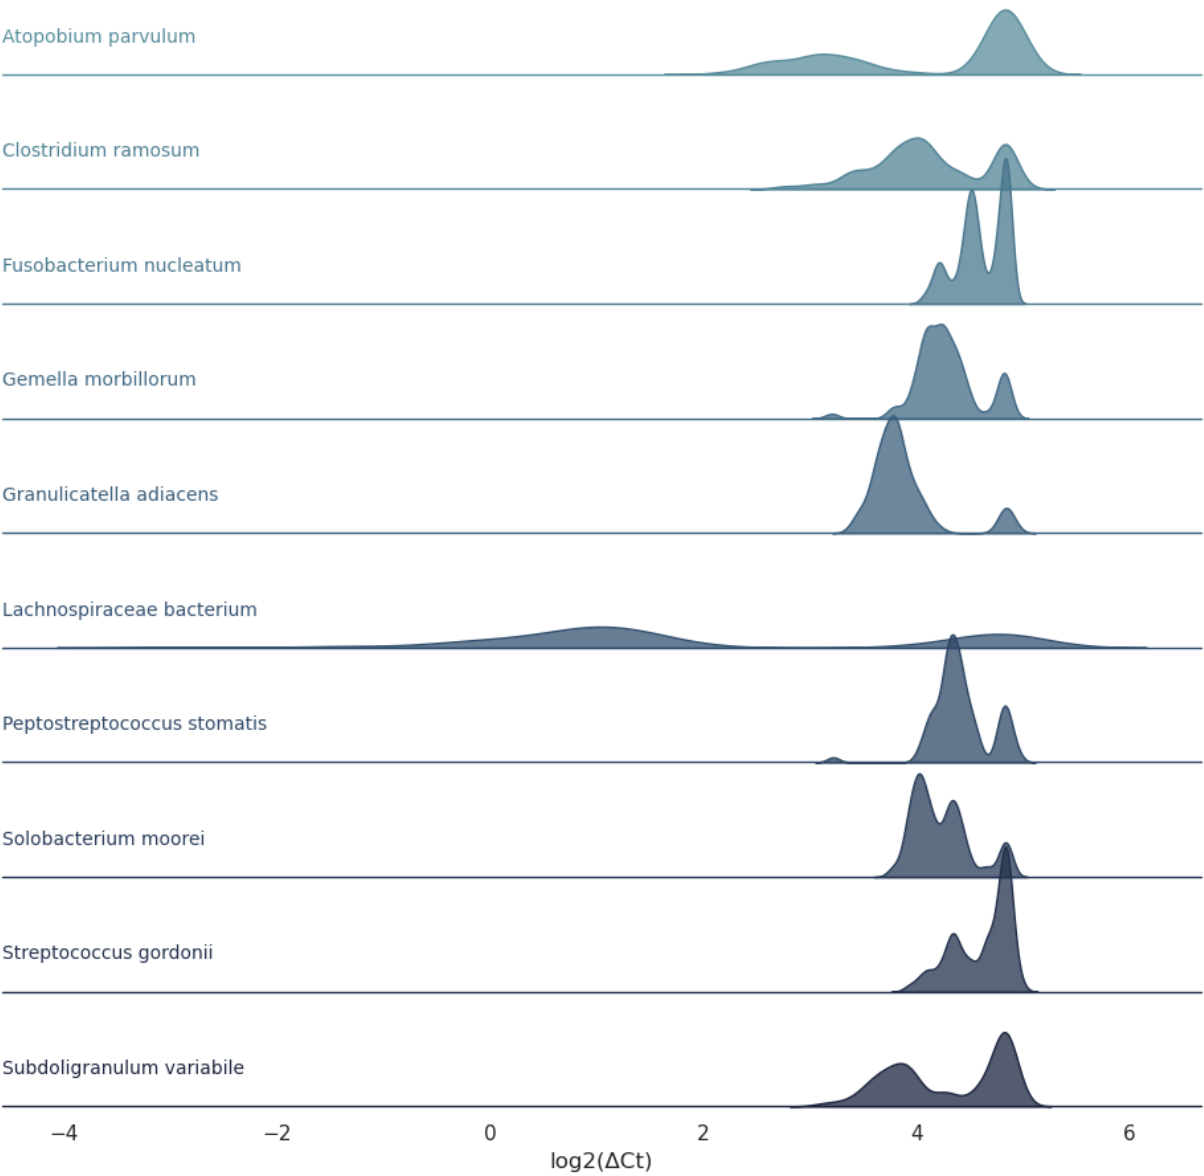

Supplement: s1 [file s1]
